# Supplementary material for: Refractive outcomes after intravitreal injection of antivascular endothelial growth factor versus laser photocoagulation for retinopathy of prematurity: a meta-analysis
Source: PubMed Central journal article supplement — BMJ Open. 2021 Feb 10;11(2):e042384. doi: 10.1136/bmjopen-2020-042384 (PMC7878142; doi:10.1136/bmjopen-2020-042384), 2021-02-10

**S1 strategy.**

Detailed search strategy for PubMed

1. Retinopathy of Prematurity[MeSH]

2. Prematurity Retinopath\*[Tiab] OR Retrolental Fibroplasia\*[Tiab]OR

Fibroplasia\* Retrolental[Tiab]

3.1 OR 2

4. Anti-VEGF[MeSH]

5. Mvasi[Tiab] OR Avastin[Tiab] OR Ranibizumab[Tiab] OR aflibercept[Tiab]

OR Anti-vascular endothelial growth factor[Tiab]

6.4 OR 5

7. Error\*,Refractive[MeSH]

8. Error\*,Refractive[Tiab] OR Refractive Error\*[Tiab]OR

Disorder\*,Refractive[Tiab] OR Ametropia[Tiab]

9.7 OR 8

10 3 AND 6 AND 9

## S2 forest plot : Forest plot of the effect of different anti-VEGF drugs on spherical equivalent.

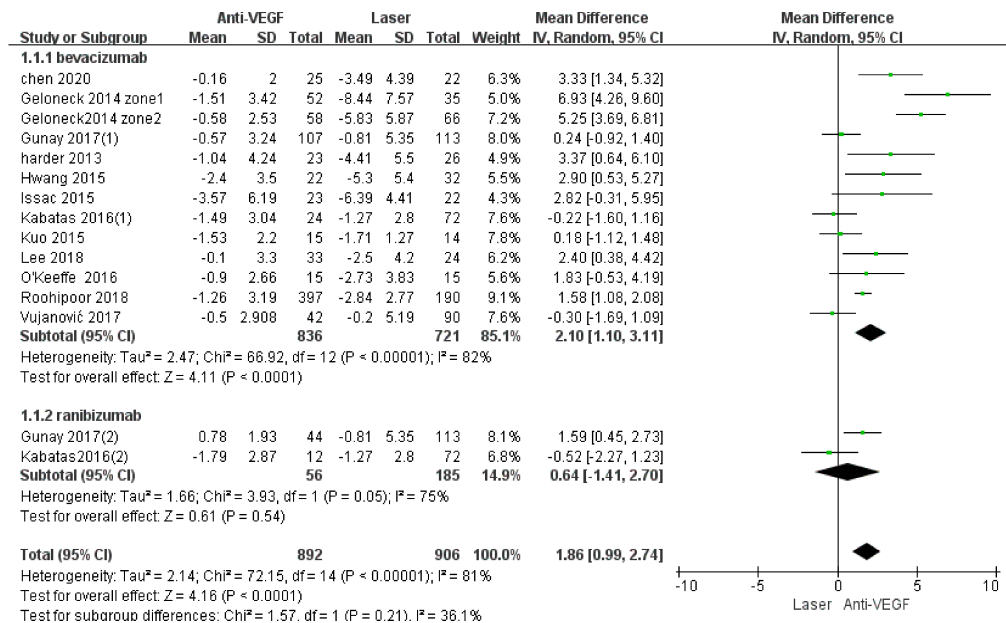

## S3 forest plot : Forest plot of the influence of different follow-up time on spherical equivalent.

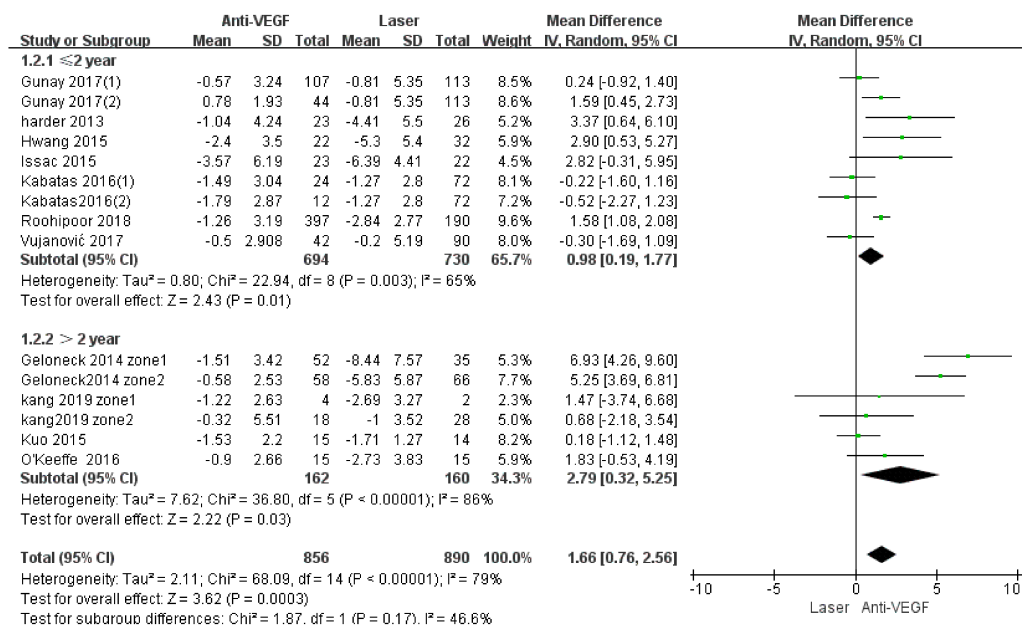

## S4 forest plot :Forest plot of lens thickness (LT).

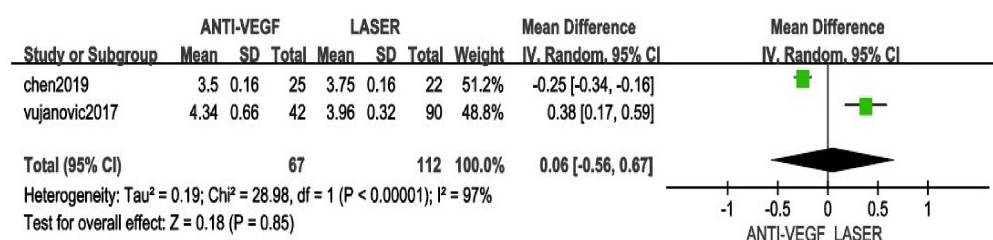

**S5 funnel plot: Publication bias was evaluated by the funnel plot.**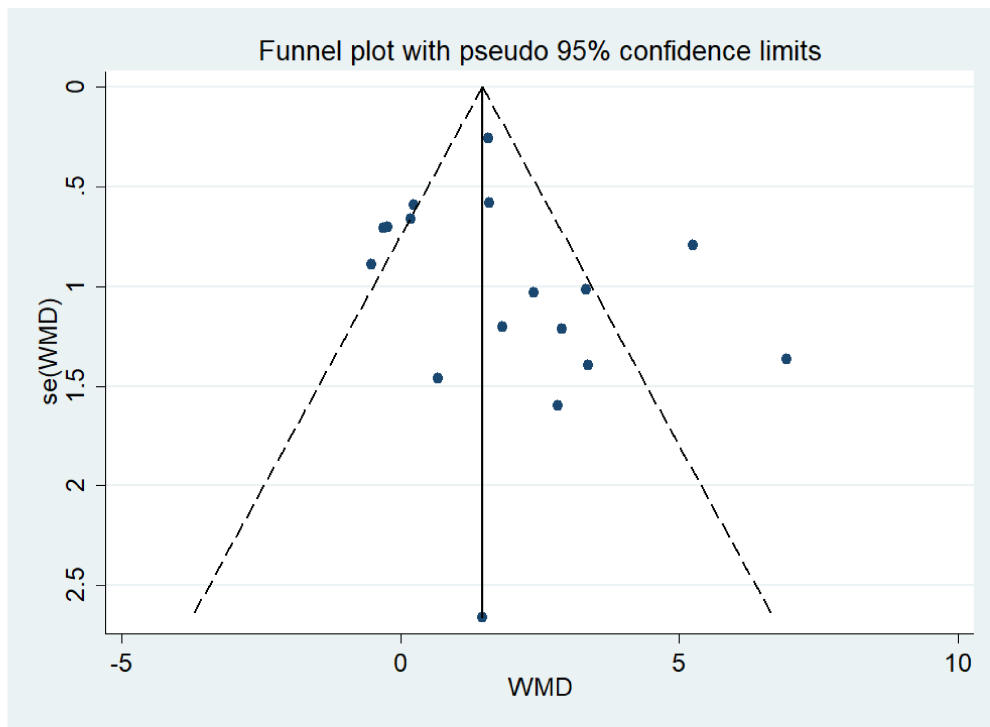

Supplement: bmjopen-2020-042384supp001.pdf [file bmjopen-2020-042384supp001.pdf]
